# Supplementary material for: Influence of solution- and thermal-annealing processes on the sub-nanometer-ordered organic–organic interface structure of organic light-emitting devices
Source: Royal Society of Chemistry journal article supplement (doi:10.1039/c6nr06654b), 2016-10-31
Supplement: c6nr06654b1.pdf [file c6nr06654b1.pdf]

## Supplementary information

### **Influence of Solution- and Thermal Annealing-Process on Sub-Nanometer-Ordered Organic–Organic Interface Structure of Organic Light-Emitting Devices**

Satoru Ohisa,<sup>a</sup> Yong-Jin Pu,<sup>a\*</sup> Norifumi L. Yamada,<sup>b</sup> Go Matsuba,<sup>a</sup> and Junji Kido<sup>a\*</sup>

<sup>a</sup>Department of Organic Materials Science, Graduate School of Organic Materials Science, Yamagata University, Yonezawa, Yamagata, 992-8510 Japan.

<sup>b</sup>Institute of Material Structure Science, High-Energy Accelerator Research Organization (KEK), 203-1 Shirakata, Tokai, Naka 319-1106, Japan

E-mail: pu@yz.yamagata-u.ac.jp; kid@yz.yamagata-u.ac.jp

## Experimental details

**Materials.** Chemical structures of the materials used in this work are shown in **Figure S1**. Materials were purchased from commercial sources, except for BCzBP and BCzBP-d<sub>14</sub>, which were synthesized according to established procedures.<sup>1, 2</sup> The deuteration ratio of the carbazole moiety was approximately 94%, as determined by <sup>1</sup>H-NMR analysis. BCzBP, BCzBP-d<sub>14</sub>, Ir(mppy)<sub>3</sub>, and TPBi were purified by sublimation. Other materials were used as received. PTPD (catalog No. ADS254BE) was purchased from American Dye Source, Inc. Weight-average and number-average molecular weights, as determined by gel permeation chromatography using polystyrene standards, were 78,000 and 28,000, respectively. Ir(mppy)<sub>3</sub>, TPBi, and Liq were purchased from e-Ray Optoelectronics Technology Co., Ltd. PEDOT:PSS (*Clevios*<sup>TM</sup> P VP CH 8000) was purchased from Heraeus Materials Technology.

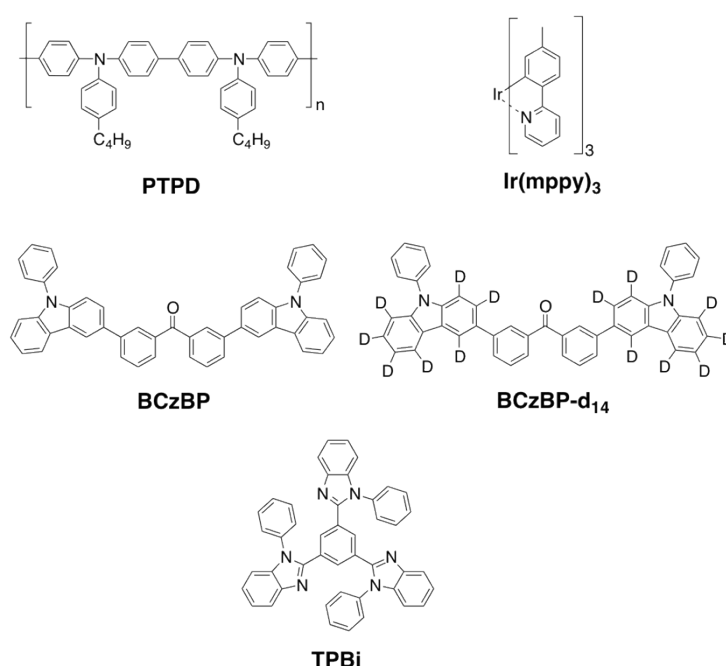

**Figure S1.** Chemical structures of the compounds used in this work.

**Film preparation.** The substrates were rinsed with acetone and 2-propanol and then dried under a stream of clean nitrogen. Prior to film formation, the substrates were cleaned with a

UV–ozone cleaner for 20 min. Films were formed by spin coating or by evaporation under high vacuum ( $<5.0 \times 10^{-5}$  Pa). PTPD and BCzBP (or BCzBP-d<sub>14</sub>):Ir(mppy)<sub>3</sub> (91:9 weight ratio) films were spin coated under the same conditions used in our previous work.<sup>2</sup> TPBi was formed from an alcohol solution. PTPD and BCzBP (or BCzBP-d<sub>14</sub>):Ir(mppy)<sub>3</sub> films were annealed at 135°C and 115°C for 10 min in a N<sub>2</sub>-purged insulating container, respectively. The TPBi film was annealed at 100°C for 5 min, followed by 115°C for 10 min in the N<sub>2</sub>-purged insulating container. PEDOT:PSS dispersion liquid was spin coated and annealed at 200°C for 10 min in air. Thicknesses of the resulting films were determined using NR results or a surface profilometer (Veeco Dektak8).

**Neutron reflectometry (NR).** Pre-cleaned cut Si wafers (KST World Corp., Japan) of 45 mm × 45 mm area were used without removal of the native oxide layer. Films were formed by spin coating or evaporation onto the Si wafers. Neutron reflectivity was recorded using the single-frame mode of the soft interface analyzer (SOFIA) horizontal-type time-of-flight neutron reflectometer ( $2.0 \text{ \AA} < \lambda < 8.8 \text{ \AA}$ ) at J-PARC (Japan Proton Accelerator Research Complex)/MLF (Materials and Life Science Experimental Facility).<sup>3, 4</sup> Neutron pulses were recorded using a two-dimensional scintillation counter, which consisted of an AR3239 photomultiplier tube (Hamamatsu Photonics K. K., Hamamatsu, Japan) with a ZnS/<sup>6</sup>LiF scintillator (Ohyo Koken, Fussa, Japan). Reflected beam spectra were collected at 0.30°, 0.75°, and 1.80°. Individual data points were combined. Direct beam measurements were collected under the same collimation conditions as the beam spectra collected at 0.30°, and the same time-of-flight profile used for the other angles was used. Least-squares analyses of the reflectivity profiles were performed using the Motofit reflectometry analysis program; interfacial roughness was included via a Nevot–Croce factor.<sup>5, 6</sup>

**Fluorescence resonance energy transfer**

**(FRET).** Pre-cleaned quartz substrates were used. A stacked film with a structure of [quartz/BCzBP:9 wt% Ir(mppy)<sub>3</sub> (40 nm)/TPBi (30 nm)] was fabricated. Each layer was sequentially formed by evaporation or spin coating. The formed films were encapsulated in glass caps with UV-cured resins and oxygen getters. Photoluminescence spectra were obtained using a HORIBA JOBIN YVON Fluoromax-4. Illuminated areas of excitation light were defined using a mask. The influence of guided light was possibly decreased by pasting black tape on the samples.

**OLED fabrication and measurements.** OLEDs were fabricated on pre-cleaned ITO substrates (Asahi Glass Co., Ltd.). OLEDs with the structure of [ITO (130 nm)/PEDOT:PSS (40 nm)/PTPD (20 nm)/BCzBP:9 wt% Ir(mppy)<sub>3</sub> (40 nm)/TPBi (30 nm)/Liq (1.5 nm)/Al (100 nm)] were fabricated. Here, PEDOT:PSS and PTPD were spin coated. BCzBP:9 wt% Ir(mppy)<sub>3</sub> was spin coated onto PTPD as the sEML and annealed at 115°C for 10 min. TPBi was spin coated as sTPBi onto the sEML, annealed at 100°C for 5 min, and then annealed at 115°C for 5 min. TPBi was also evaporated onto the sEML. eTPBi was either not annealed or annealed at 125°C for 10 min. Liq and Al were evaporated successively. The fabricated devices were encapsulated in glass caps with UV-cured resins and oxygen getters. All of the emission areas were 2 mm × 2 mm. The current density–voltage characteristics and luminance–voltage characteristics of the OLEDs were measured using a Keithley 2400 current source and a Konica Minolta CS-200 luminance meter, respectively. EL spectra were collected using a Konica Minolta CS-2000 spectral radiance meter. Quantum efficiencies were calculated using the Lambertian assumption.

## ***Thermal and photophysical properties***

Thermal properties were characterized using differential scanning calorimetry (Perkin Elmer Diamond DSC). The scan speed was 10°C/min. UV absorption measurements were performed using a UV–Vis–NIR spectrometer (SHIMADZU UV-3150). Optical band gaps were determined from the UV spectra. Photoluminescence spectra excited by 320-nm light were obtained using a spectrofluorometer (HORIBA JOBIN YVON Fluoromax-4). Phosphorescence spectra were obtained at 5 K under excitation by a nitrogen laser ( $\lambda = 337$  nm, 50 Hz, 800-ps pulses) combined with a Hamamatsu C4334 streak scope and a Hamamatsu C4792-02 synchronous delay generator. Ionization potentials (*IP*) were determined by atmospheric UV photoelectron yield spectroscopy. Electron affinity (*EA*) values were determined by subtracting optical band gaps from ionization potentials.

**Table S1.** Material characteristics.

| Materials             | $T_g$ (°C) <sup>a</sup> | <i>IP</i> (eV) <sup>b</sup> | <i>EA</i> (eV) <sup>c</sup> | $E_g$ (eV) <sup>d</sup> | $T_1$ (eV) <sup>e</sup> |
|-----------------------|-------------------------|-----------------------------|-----------------------------|-------------------------|-------------------------|
| PTPD                  | 224                     | 5.3                         | 2.4                         | 2.9                     | 2.3                     |
| BCzBP                 | 119                     | 5.9                         | 2.6                         | 3.3                     | 2.7                     |
| BCzBP-d <sub>14</sub> | 120                     | n.d.                        | n.d.                        | n.d.                    | n.d.                    |
| Ir(mppy) <sub>3</sub> | n.d.                    | 5.5                         | 3.1                         | 2.4                     | 2.4                     |
| TPBi                  | 122                     | 6.2                         | 2.7                         | 3.5                     | 2.7                     |

<sup>a</sup>Glass-transition temperatures determined from differential scanning calorimetry measurements. <sup>b</sup>Ionization potentials determined from photoelectron yield spectroscopy measurements. <sup>c</sup>Electron affinities determined from subtraction energy gaps from the ionization potentials. <sup>d</sup>Energy gaps determined from UV–vis absorption measurements. <sup>e</sup>Lowest triplet energies determined from phosphorescence spectra.

## ***Solvent resistances of films***

PTPD, BCzBP, and Ir(mppy)<sub>3</sub> films were prepared on quartz substrates. These films were rinsed with corresponding upperlayer coating solvents. UV–vis absorption spectra of these films were collected before and after the rinsing (**Figure S2**).

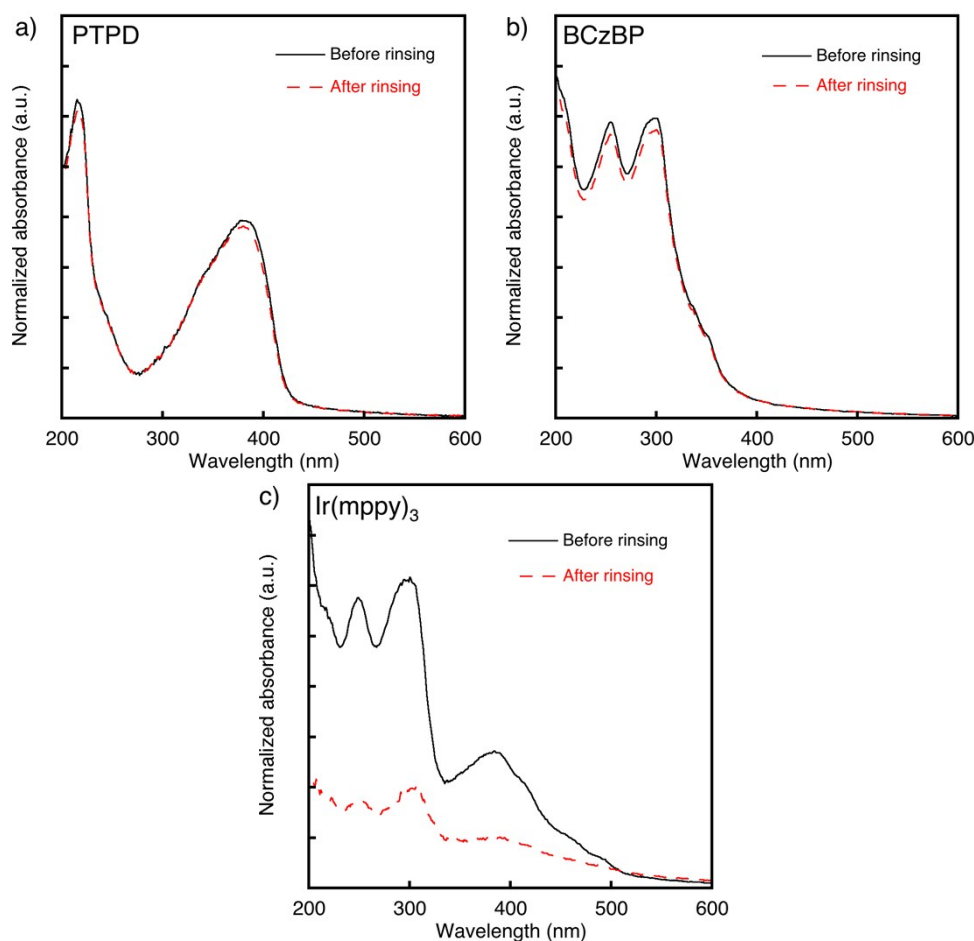

**Figure S2.** Normalized UV absorption spectra before and after rinsing of single-layer films: a) PTPD, b) BCzBP, and c) Ir(mppy)<sub>3</sub>.

### ***Evaluation of single-layer films by NR***

Stacked films were analyzed on the basis of the results from analyses of single-layer films. Therefore, we analyzed single-layer films by NR. We have already reported the analyses of PTPD and BCzBP-d<sub>14</sub>:9 wt% Ir(mppy)<sub>3</sub> single-layer films in our previous work.<sup>2</sup> PTPD, BCzBP-d<sub>14</sub>:9 wt% Ir(mppy)<sub>3</sub>, and TPBi were spin coated onto a Si wafer. Each film was annealed at 135°C for 10 min; 115°C for 10 min; or 100°C for 5 min followed by 115°C for 10 min. These temperatures are higher than the boiling points of each solvent used to form the films. Furthermore, these annealing temperatures are lower than the  $T_g$ s of the compounds (i.e., 224°C for PTPD, 120°C for BCzBP-d<sub>14</sub>, and 124°C for TPBi). BCzBP-d<sub>14</sub>:9 wt% Ir(mppy)<sub>3</sub> and TPBi were also evaporated onto a Si wafer under high vacuum. NR measurements of the single-layer films were

performed (**Figure S3**); the results obtained from the least-squares fits are summarized in **Table S2**. Each reflectivity curve was well fitted with a one-organic-layer model. The SLDs of sEML and eEML are high because of the use of the deuterated compound, BCzBP-d<sub>14</sub>.

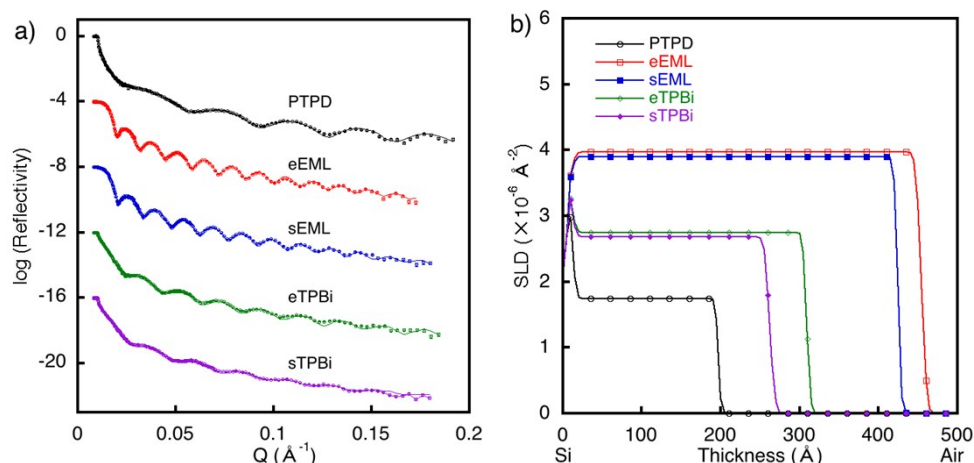

**Figure S3.** Neutron reflectometry results for single-layer films. a) Reflectivity profiles and b) SLD profiles of Si/PTPD (open circles), Si/eEML (open squares), Si/sEML (closed squares), Si/eTPBi (open diamonds), and Si/sTPBi (closed diamonds). The reflectivity scale corresponds to the profile for Si/PTPD. For clarity, the other plots are successively offset by 4 log units. eEML: evaporated BCzBP-d<sub>14</sub>:9 wt% Ir(mppy)<sub>3</sub>; sEML: spin-coated BCzBP-d<sub>14</sub>:9 wt% Ir(mppy)<sub>3</sub>; eTPBi: evaporated TPBi; sTPBi: spin-coated TPBi.

**Table S2.** Fitting results of NR measurements.

| Sample layout              | PTPD                                                             | BCzBP-d <sub>14</sub> :Ir(mppy) <sub>3</sub>                     | TPBi                                                             |
|----------------------------|------------------------------------------------------------------|------------------------------------------------------------------|------------------------------------------------------------------|
|                            | d / SLD / $\sigma^a$<br>(Å / $\times 10^{-6} \text{Å}^{-2}$ / Å) | d / SLD / $\sigma^a$<br>(Å / $\times 10^{-6} \text{Å}^{-2}$ / Å) | d / SLD / $\sigma^a$<br>(Å / $\times 10^{-6} \text{Å}^{-2}$ / Å) |
| PTPD                       | 185 / 1.74 / 4                                                   | - / - / -                                                        | - / - / -                                                        |
| eEML                       | - / - / -                                                        | 442 / 3.97 / 7                                                   | - / - / -                                                        |
| sEML                       | - / - / -                                                        | 413 / 3.90 / 5                                                   | - / - / -                                                        |
| eTPBi                      | - / - / -                                                        | - / - / -                                                        | 297 / 2.75 / 5                                                   |
| sTPBi                      | - / - / -                                                        | - / - / -                                                        | 250 / 2.68 / 7                                                   |
| sEML/sTPBi                 | - / - / -                                                        | 336 / 3.64 / 60                                                  | 290 / 2.96 / 5                                                   |
| sEML/eTPBi (w/o annealing) | - / - / -                                                        | 401 / 3.87 / 5                                                   | 297 / 2.72 / 5                                                   |
| sEML/eTPBi (115°C)         | - / - / -                                                        | 405 / 3.84 / 5                                                   | 299 / 2.74 / 5                                                   |
| sEML/eTPBi (120°C)         | - / - / -                                                        | 414 / 3.77 / 16                                                  | 288 / 2.77 / 5                                                   |
| sEML/eTPBi (130°C)         | - / - / -                                                        | 535 / 3.38 / 60                                                  | 172 / 3.30 / 5                                                   |
| PTPD/eEML/eTPBi            | 185 / 1.74 / 5                                                   | 433 / 3.94 / 5                                                   | 298 / 2.74 / 6                                                   |
| PTPD/sEML/eTPBi            | 223 / 2.38 / 15                                                  | 357 / 3.87 / 5                                                   | 298 / 2.74 / 6                                                   |
| PTPD/sEML/sTPBi            | 227 / 2.40 / 14                                                  | 294 / 3.64 / 60                                                  | 271 / 2.96 / 5                                                   |

<sup>a</sup>d, SLD, and  $\sigma$  represent thickness, scattering length density, and interfacial roughness, respectively.

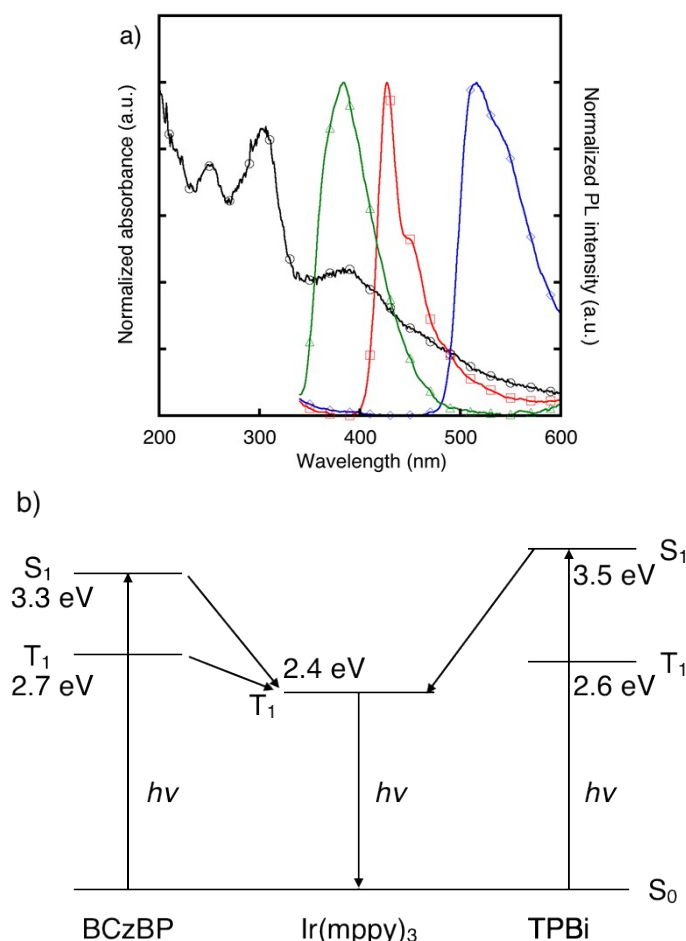

**Figure S4.** Normalized UV and photoluminescence spectra and a schematic of the energy transfer mechanism. a) UV absorption spectrum of Ir(mppy)<sub>3</sub> (circles) and PL spectra of BCzBP:9 wt% Ir(mppy)<sub>3</sub> (diamonds), TPBi (triangles) and PTPD (squares). b) Energy transfer mechanism.

### *Volume ratio estimation of each material in mixed layers*

The volume ratios of each material were calculated using the SLD values of the mixed-layer and single-layer films. For example, we considered mixed layers to be constituted of two materials: A and B. The SLD values of the mixed layer and the single layers of materials A and B are represented as  $SLD_{mix}$ ,  $SLD_A$ , and  $SLD_B$ , respectively.  $SLD_{mix}$  was approximated as a linear combination of the SLD values of the corresponding single-layer films,  $SLD_A$  and  $SLD_B$ , as follows:

$$SLD_{mix} = \varphi_A \times SLD_A + \varphi_B \times SLD_B$$



where  $\phi_A$  and  $\phi_B$  are the volume ratios of materials A and B in the mixed layer. We did not consider the effects of differences in the molecular packing state on the film density between the mixed-layer and the single-layer films. We also treated two kinds of materials, BCzBP-d<sub>14</sub> and Ir(mppy)<sub>3</sub>, as a single material that could not be separated.

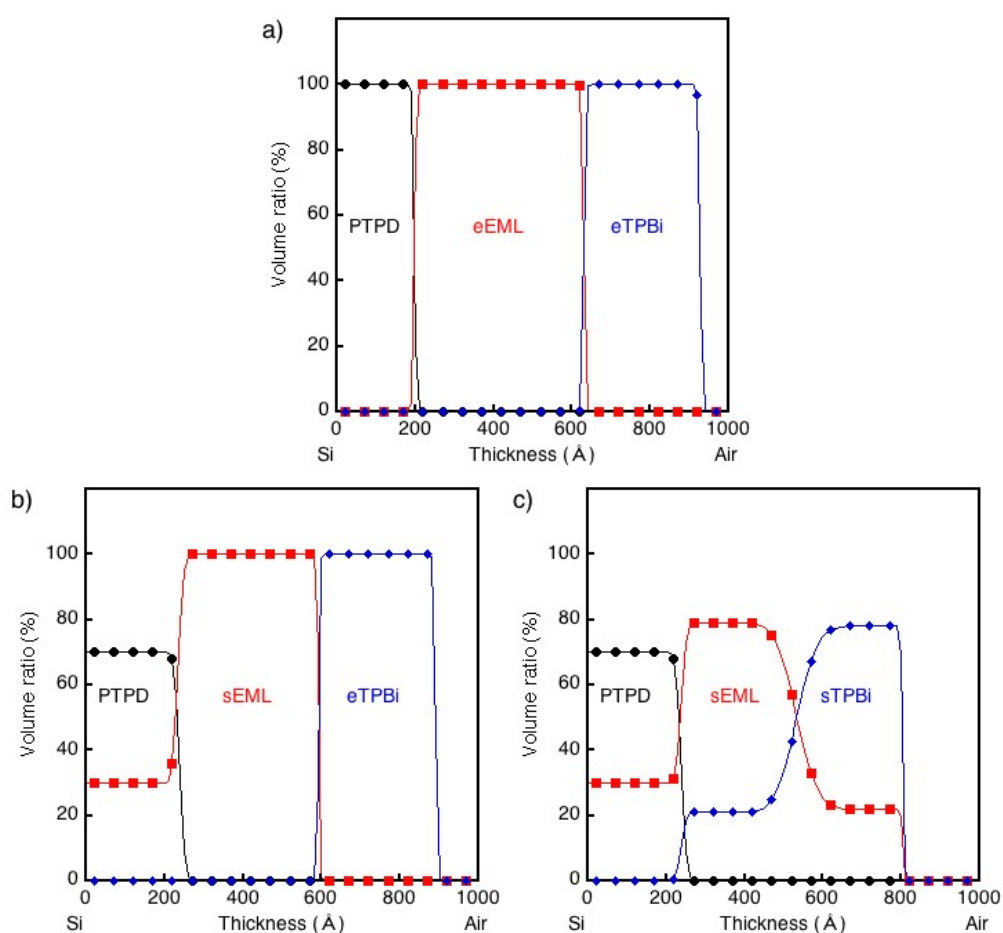

**Figure S5.** Materials distribution profiles of trilayer films: a) PTPD/eEML/eTPBi, b) PTPD/sEML/eTPBi, and c) PTPD/sEML/sTPBi.

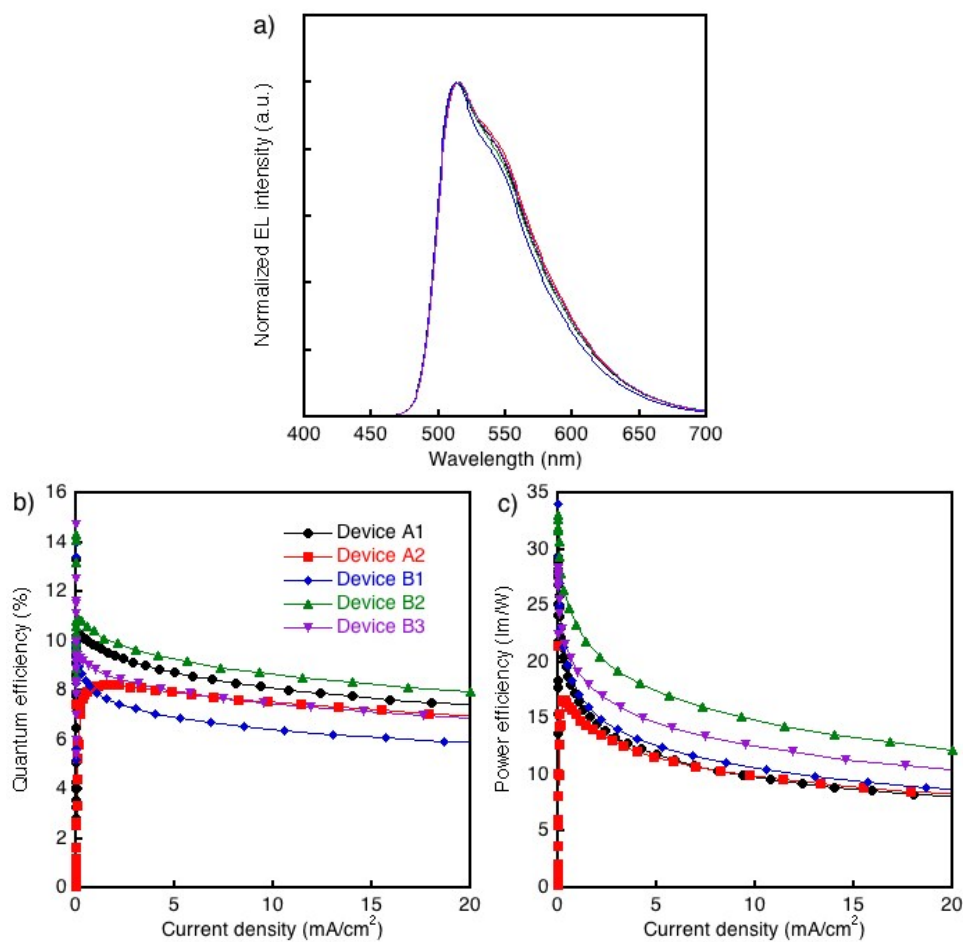

**Figure S6.** EL characteristics. a) EL spectra and b) quantum efficiency–current density and c) power efficiency–current density characteristics of OLEDs with sEML/sTPBi (Device A1: black closed circles), eEML (annealed)/eTPBi (annealed) (Device A2: red closed squares), eEML/eTPBi (Device B1: blue closed diamonds), sEML/eTPBi (Device B2: green triangles), and eEML (annealed)/eTPBi (Device B3: purple inverted triangles).

## References

1. C.-H. Jun, Y.-J. Pu, M. Igarashi, T. Chiba, H. Sasabe, J. Kido, *Chem. Lett.* 2014, **43**, 1935-1936.
2. S. Ohisa, Y. J. Pu, N. L. Yamada, G. Matsuba, J. Kido, *ACS Appl. Mater. Interfaces* 2015, **7**, 20779-20785.
3. K. Mitamura, N. L. Yamada, H. Sagehashi, N. Torikai, H. Arita, M. Terada, M. Kobayashi, S. Sato, H. Seto, S. Goko, M. Furusaka, T. Oda, M. Hino, H. Jinnai, A. Takahara, *Polym. J.* 2012, **45**, 100-108.
4. N. L. Yamada, N. Torikai, K. Mitamura, H. Sagehashi, S. Sato, H. Seto, T. Sugita, S. Goko, M. Furusaka, T. Oda, M. Hino, T. Fujiwara, H. Takahashi, A. Takahara, *Eur. Phys. J. Plus* 2011, **126**, 108
5. A. Nelson, *J. Appl. Crystallogr.* 2006, **39**, 273-276.
6. A. Nelson, *J. Phys.: Conf. Ser.* 2010, **251**, 012094.
